# Supplementary material for: Vehicle-induced turbulence and atmospheric pollution
Source: Copernicus journal article supplement (doi:10.5194/acp-21-12291-2021), 2021-08-17
Supplement: Supplementary file 1 [file acp-21-12291-2021-supplement.pdf]

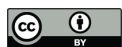

*Supplement of*

## **Vehicle-induced turbulence and atmospheric pollution**

**Paul A. Makar et al.**

*Correspondence to:* Paul A. Makar ([paul.makar@canada.ca](mailto:paul.makar@canada.ca))

The copyright of individual parts of the supplement might differ from the article licence.

**This PDF file includes:**

Supplementary text for model evaluation, for Table S1.  
Supplementary text for Figure S5; relative effects of forest canopy shading and  
turbulence compared to VIT  
Figures S1 to S15  
Tables S1, S2

**Supplementary Information Text***Statistics used for model evaluation*

The formulae for the standard statistical metrics used here for model performance evaluation, their abbreviations, description, and the value of a perfect model score, appear in Table S1. Model values for evaluation were taken from the lowest model layer in the grid cell closest to the surface monitoring network observation points (nearest neighbor approach; no interpolation of model values).

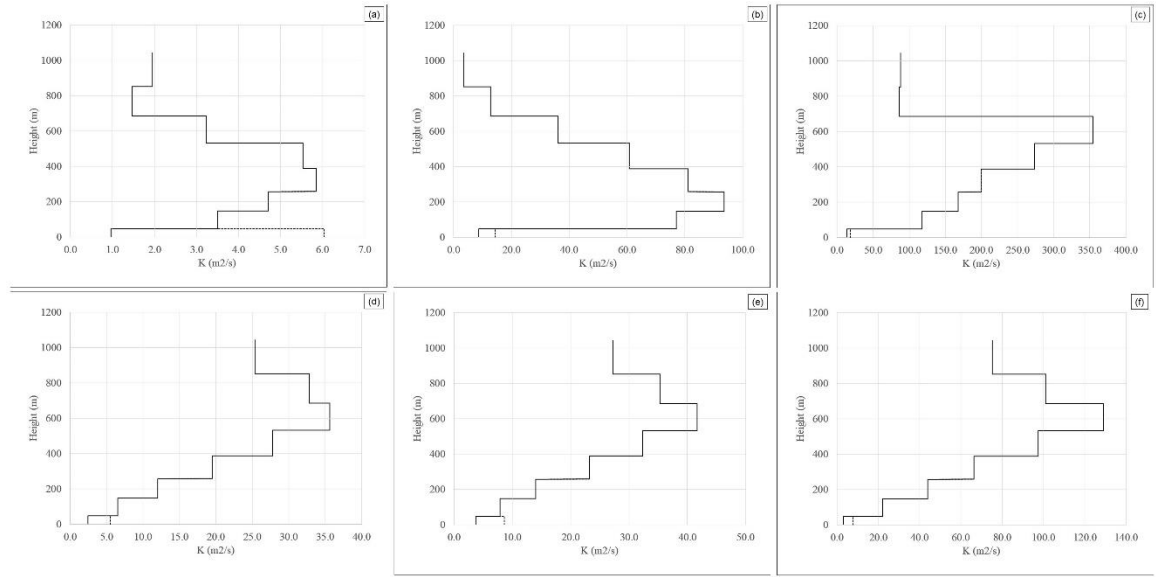

**Fig. S1.** : Comparison of average  $K_T$  (solid line) and  $K_T + K_{VIT}$  (dashed line), for Manhattan Island grid cell, 2.5km resolution simulations. (a) July, 10 UT (6 AM EDT), (b) July 14 UT (10 AM EDT), (c) July, 22 UT (6 PM EDT), (c) January, 10 UT (6 AM EST), (d) January, 14 UT (10 AM EST), (e) January, 22 UT (6 PM EST).

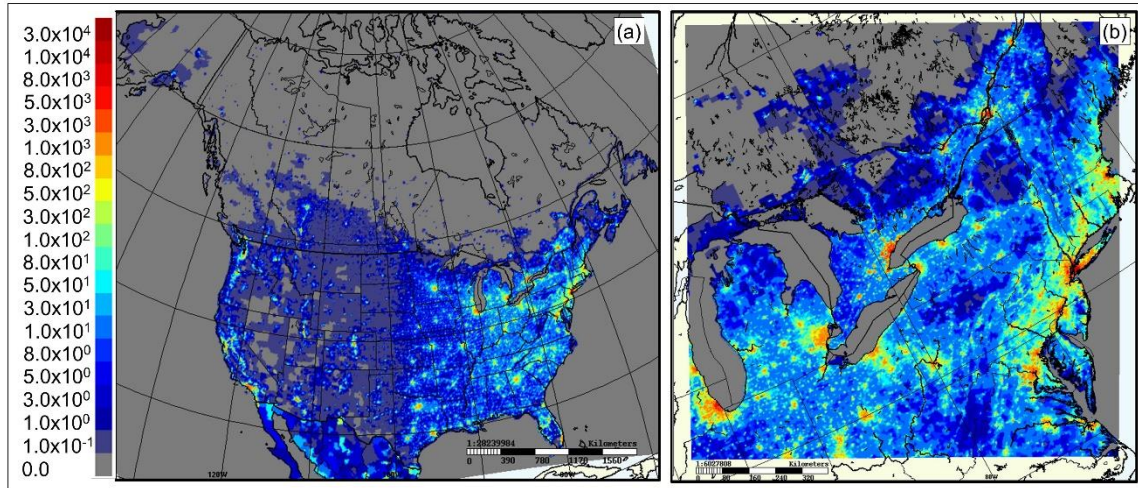

**Fig. S2.** Population density ( $\text{km}^{-2}$ ) for (a) North American 10km grid cell size; (b) High Resolution 2.5km grid cell size domains.

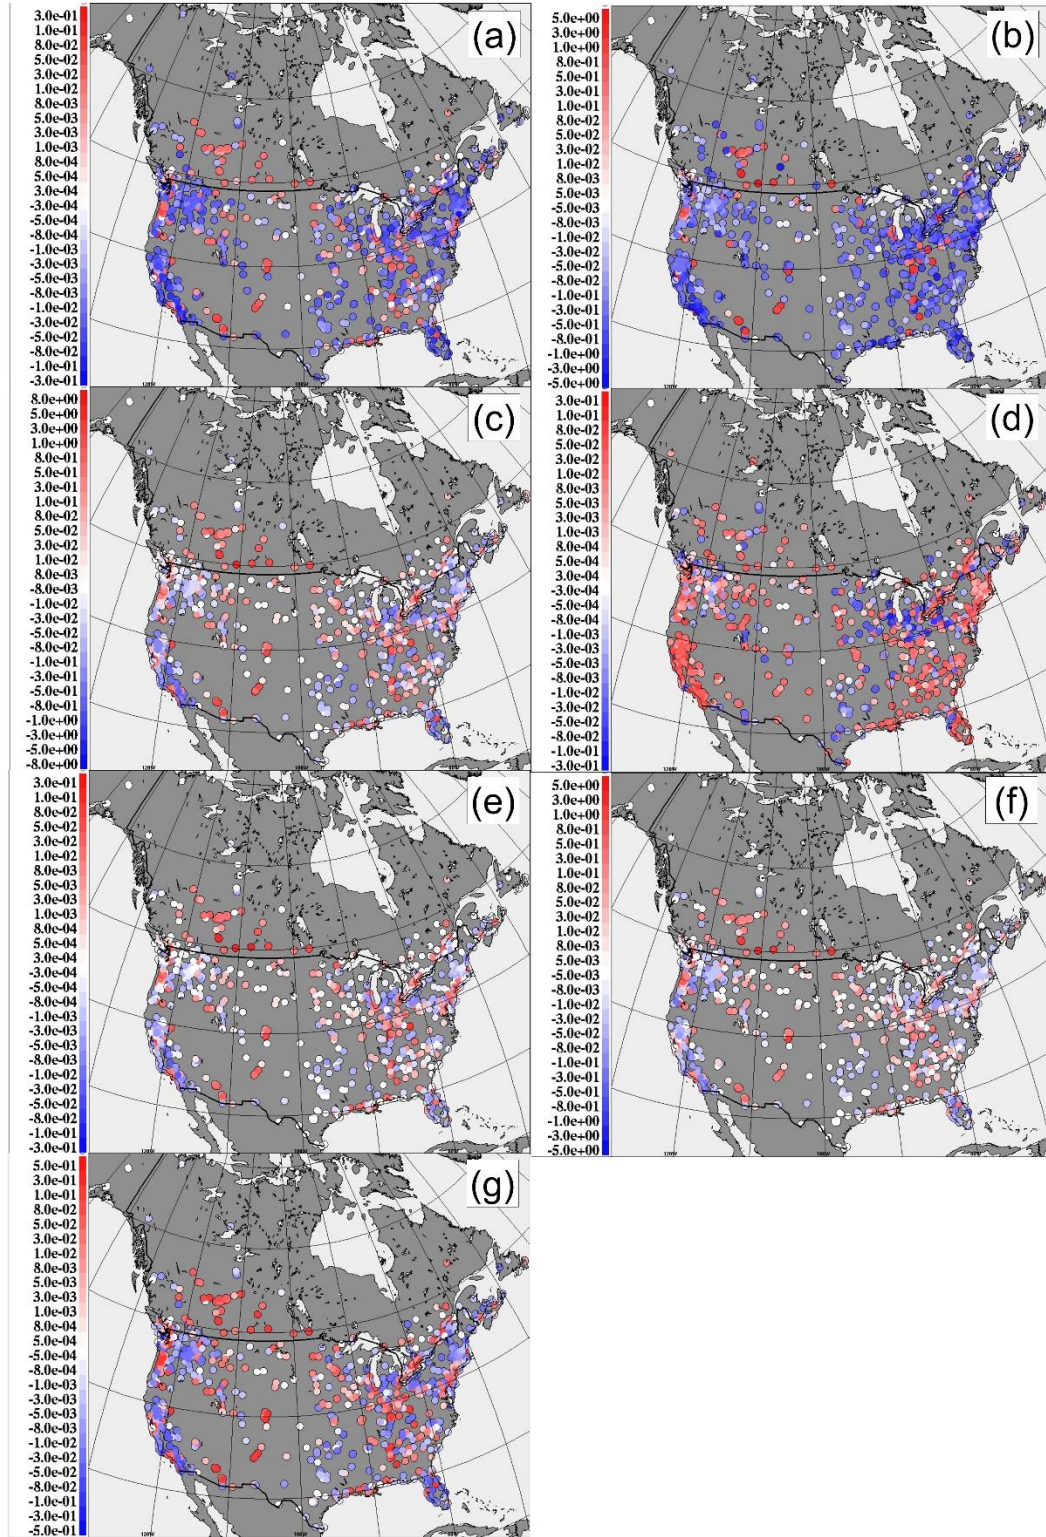

**Fig. S3.** Change in model PM<sub>2.5</sub> performance at 943 North American surface monitoring sites, July 2016 ( $\mu\text{g m}^{-3}$ ). Red colours indicate stations where the addition of the VIT parameterization improved model performance, blue colours indicate stations where the addition of the VIT parameterization degraded model performance. (a)  $\Delta FAC2_{VIT-No VIT}$ ; (b)  $\Delta |MB|_{No VIT-VIT}$ ; (c)  $\Delta MGE_{No VIT-VIT}$ ; (d)  $\Delta r_{VIT-No VIT}$ ; (e)  $\Delta RMSE_{No VIT-VIT}$ ; (f)  $\Delta COE_{VIT-No VIT}$ ; (g)  $\Delta IOA_{VIT-No VIT}$ .



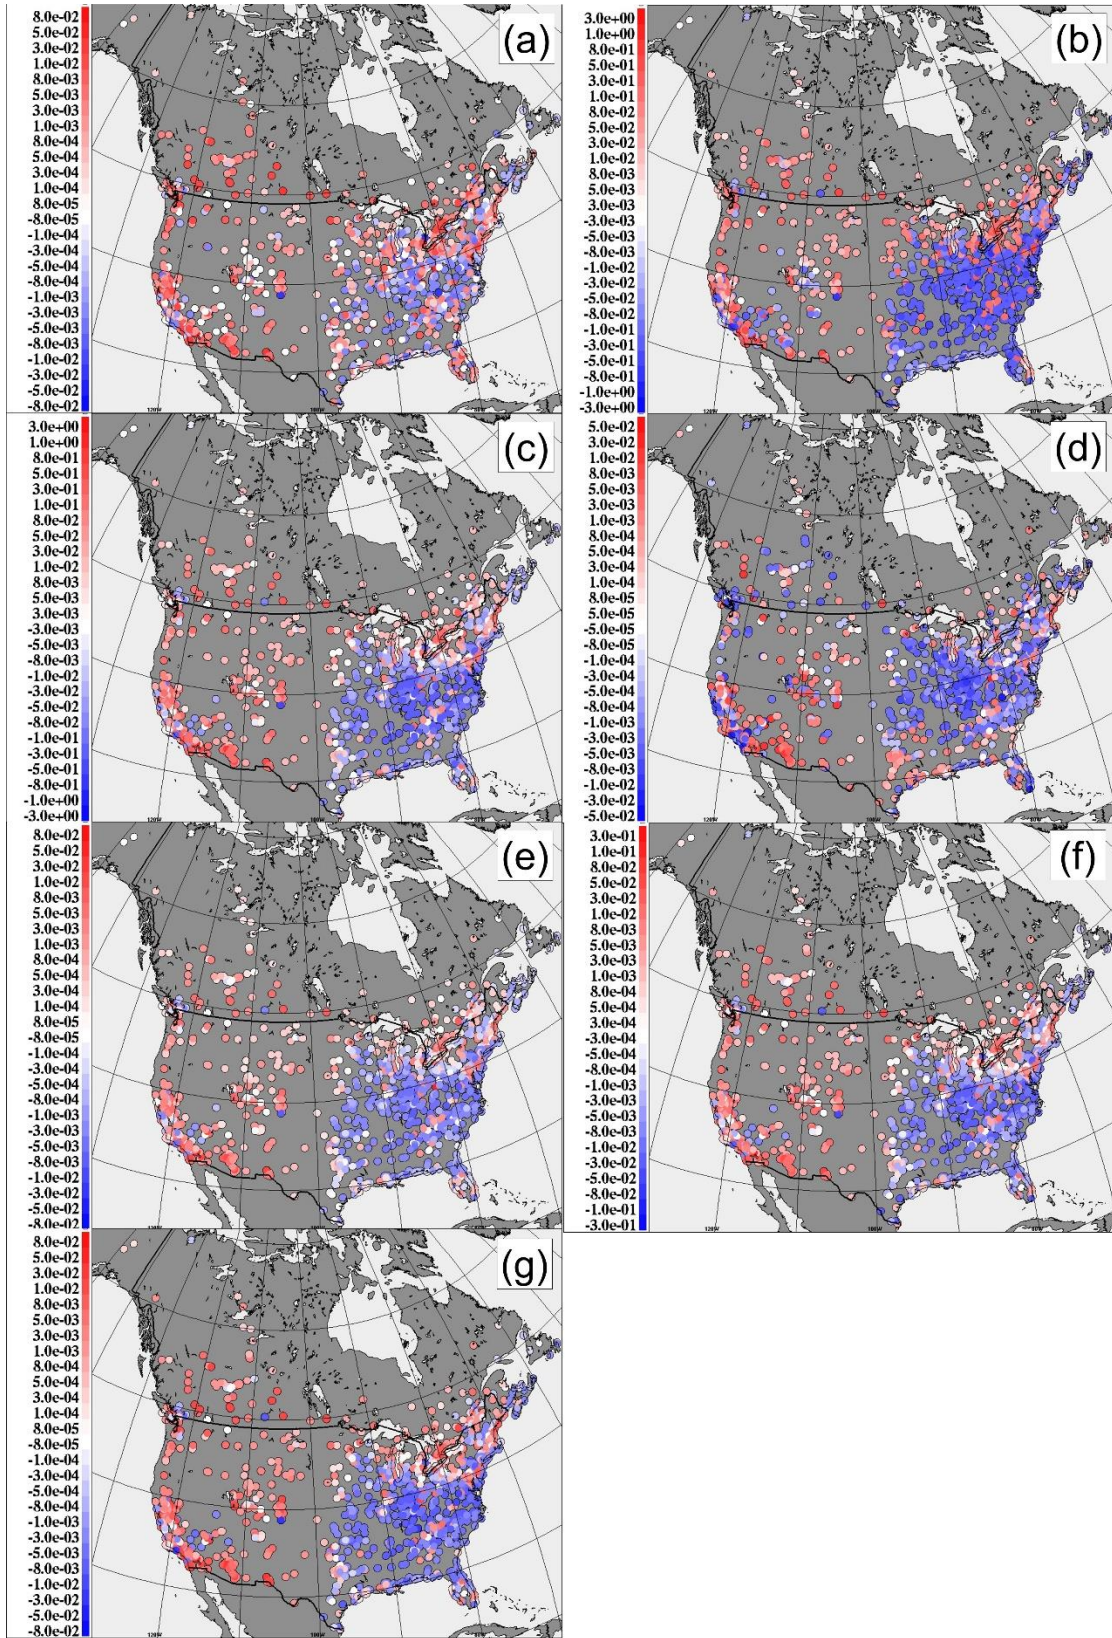

**Fig. S4.** Change in model O<sub>3</sub> performance at 1384 North American surface monitoring sites, July 2016 (ppbv). Colours and panel labels as in Figure S3.

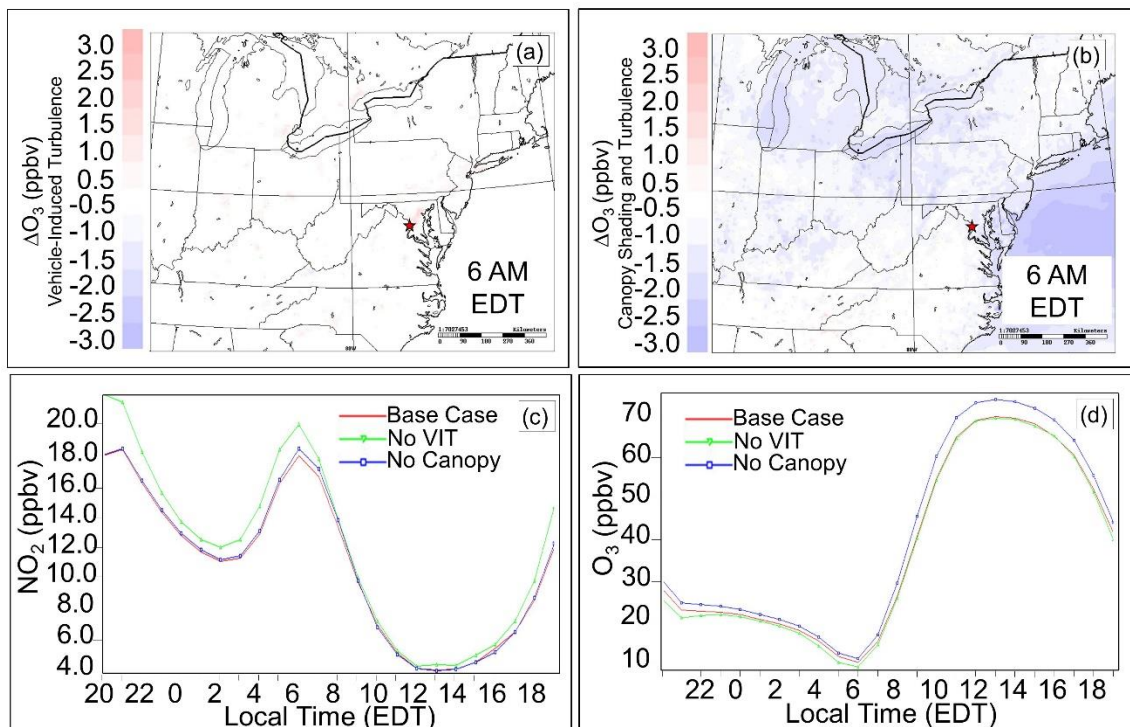

**Fig. S5.** Change in model  $NO_2$  and  $O_3$  for the months of July, August and September of 2016 associated with VIT and forest canopy turbulence. (a) Change in average surface  $O_3$  due to vehicle-induced turbulence at 6 AM local time. Note small increases (pink) in urban areas. (b) Change in average  $O_3$  due to reduced turbulence and shading within forested canopies (blue). (c) Changes in average  $NO_2$  concentration in Washington, D.C. associated with removing the VIT and forest canopy parameterizations. (d) Changes in average  $O_3$  concentration associated with removing the VIT and forest canopy parameterizations.

Our main text focusses on the impact of vehicle-induced turbulence relative to a simulation containing neither VIT nor the effects of forest canopy shading and turbulence. Here, we briefly discuss the effects of *combining* these two parameterizations, using a set of three July-August-September 2016 simulations.

The details of the forest canopy shading and turbulence parameterization are discussed elsewhere (Makar et al., 2017). Briefly, this parameterization accounts for the reduction in turbulent kinetic energy and in photolysis rates associated forest canopies. In this parameterization, three additional vertical layers are added to below the canopy height, turbulence is decreased to account for lower TKE values below the canopy height, and the shading due to foliage (a function of canopy height, leaf area index, and clumping index) is used to reduce photolysis rates. The reader is directed to Makar et al (2017) for the observational basis and mathematical description underlying this parameterization.

Figure S5(a) shows the effect of VIT on July-August-September average  $O_3$  concentrations at 6 AM local time. Small increases in  $O_3$  concentrations occur, in the urban areas, due to the reduction in  $NO_x$  titration in the early morning hours resulting from VIT. These increases in  $O_3$  are on the order of 0.5 ppbv or less (light pink shades). Figure S5(b) shows the effect of forest canopy turbulence and shading on  $O_3$  concentrations in the same region; decreases in average  $O_3$  over the region of up to 3 ppbv. Combined, the canopy turbulence and shading has a stronger impact on  $O_3$  biases than vehicle-induced turbulence. Figure S5(c) shows the hourly average  $NO_2$  concentrations in Washington DC for three simulations: a base case (red line) which includes both VIT and forest canopy effects, and two scenarios, in which the VIT parameterization



(green line) and the forest canopy parameterization (blue line) are removed. The VIT parameterization is responsible for a nighttime and early morning  $\text{NO}_2$  reduction of about 2 ppbv (going from green to red lines), while the canopy parameterization has minimal impact on urban  $\text{NO}_2$ . Figure S5(d) shows the corresponding average  $\text{O}_3$  time series; the VIT parameterization results in a small nighttime increase in  $\text{O}_3$  (going from green to red line), but this is offset when forest canopy effects are included; the latter are also responsible for reducing the average daytime  $\text{O}_3$  by about 5 ppbv (going from blue to red lines).

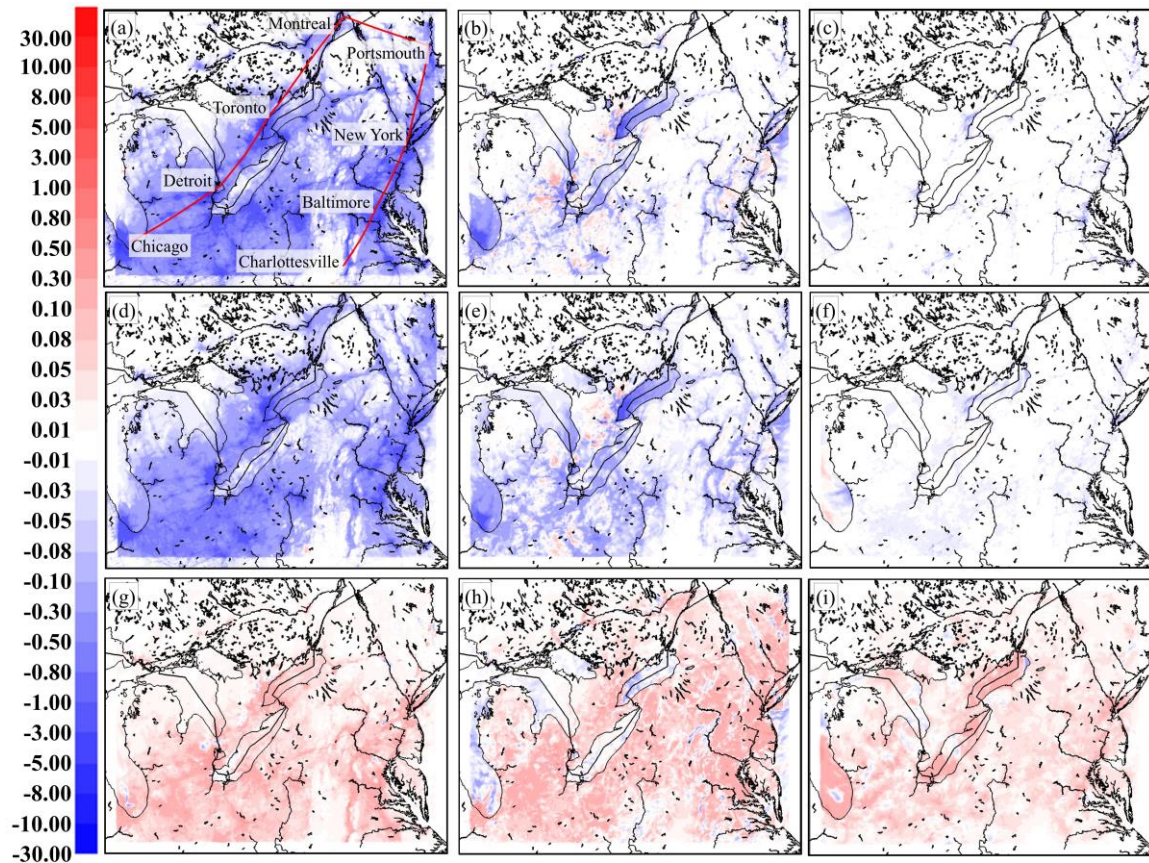

**Fig. S6.** Difference in 30 day average surface  $\text{NO}_2$ ,  $\text{PM}_{2.5}$  and  $\text{O}_3$ , July 2015, PanAm 2.5km grid cell size domain simulation. Averages are paired at (10, 14, and 22UT) according to species; (a,b,c):  $\Delta\text{NO}_2$  (ppbv) (d,e,f)  $\Delta\text{PM}_{2.5}$  ( $\mu\text{g m}^{-3}$ ); (g,h,i)  $\Delta\text{O}_3$  (ppbv). Red line in panel (a) indicates position of vertical cross-section shown in Figure S8.



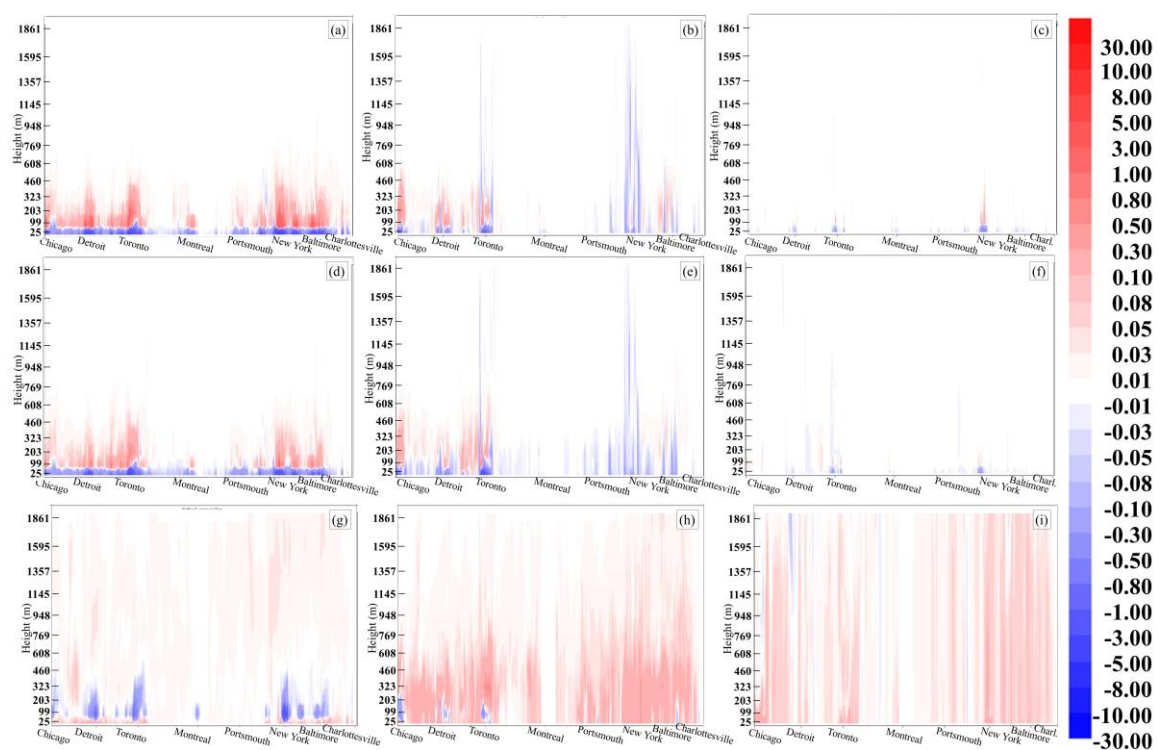

**Fig. S7.** Vertical cross-sections of concentration differences between major eastern North American cities, July 2015, panels and units arranged as in Figure S6. Vertical coordinate: unitless hybrid, top-of-scale is approximately 2 km.

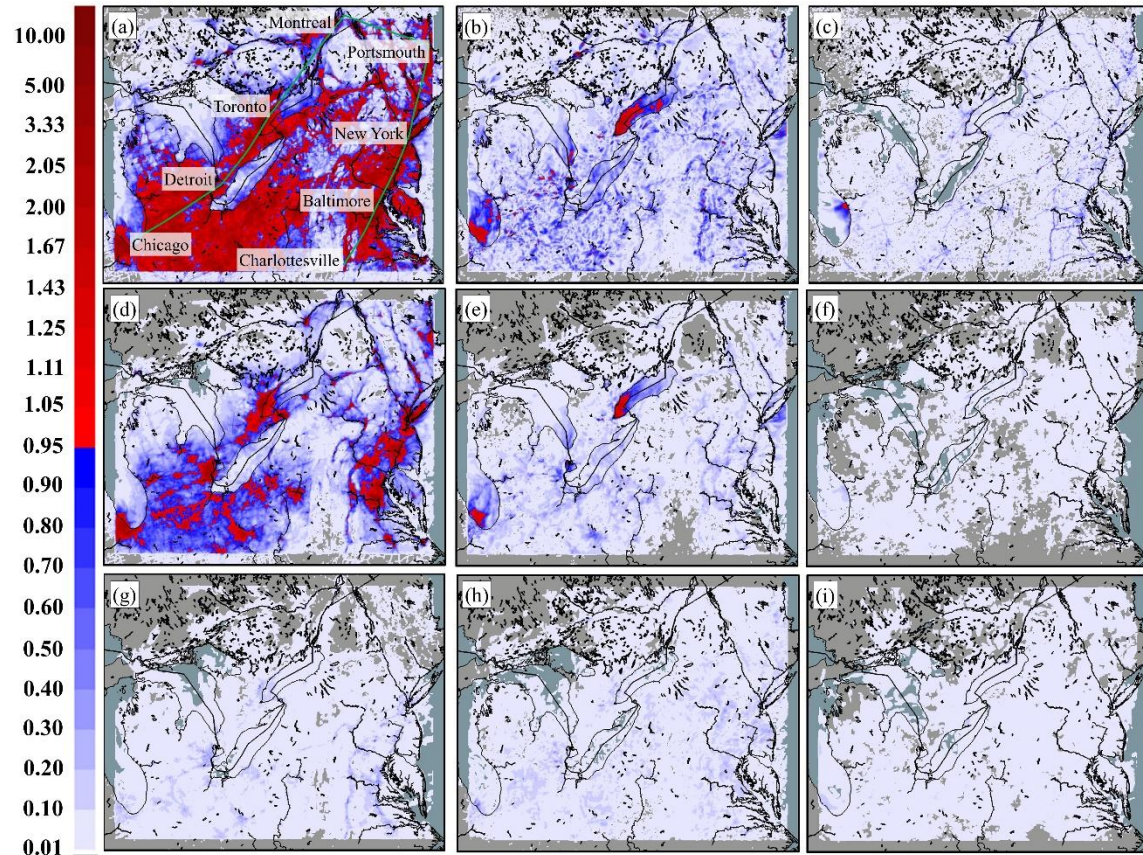

**Fig. S8.** 90% confidence ratio corresponding to Figure S6. Values greater than unity indicate the model simulation values are different at the 90% confidence level.

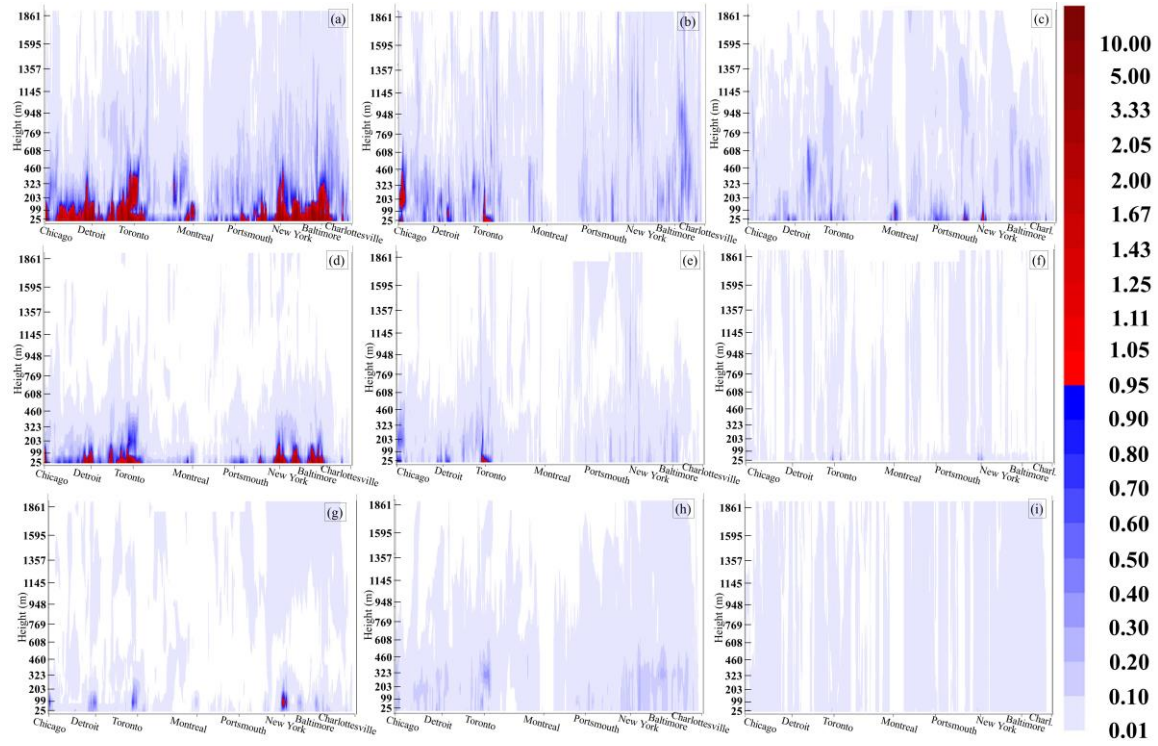

**Fig. S9.** Vertical cross-sections of 90% confidence ratio corresponding to Figure S8. Values greater than unity indicate the model simulation values are different at the 90% confidence level.



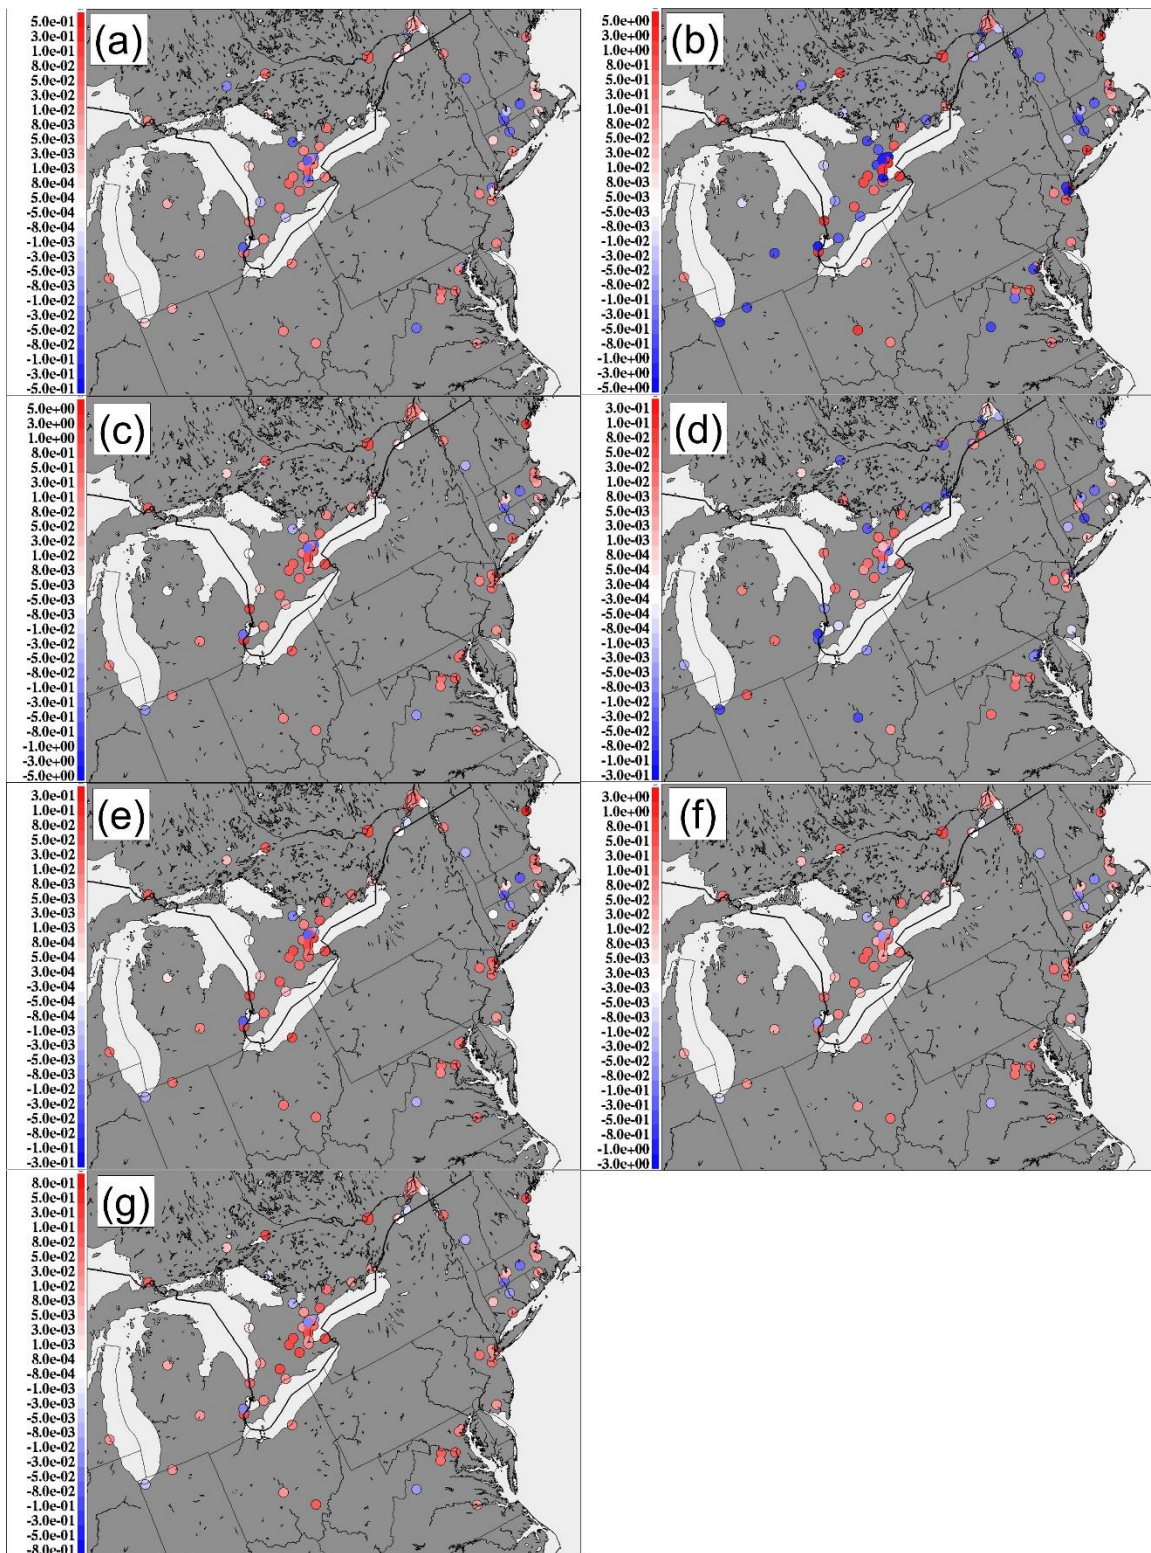

**Fig. S10.** Change in model NO<sub>2</sub> performance at 94 surface monitoring sites in the PanAM 2.5km domain, July 2015 (ppbv). Colours and panel labels as in Figure S3.



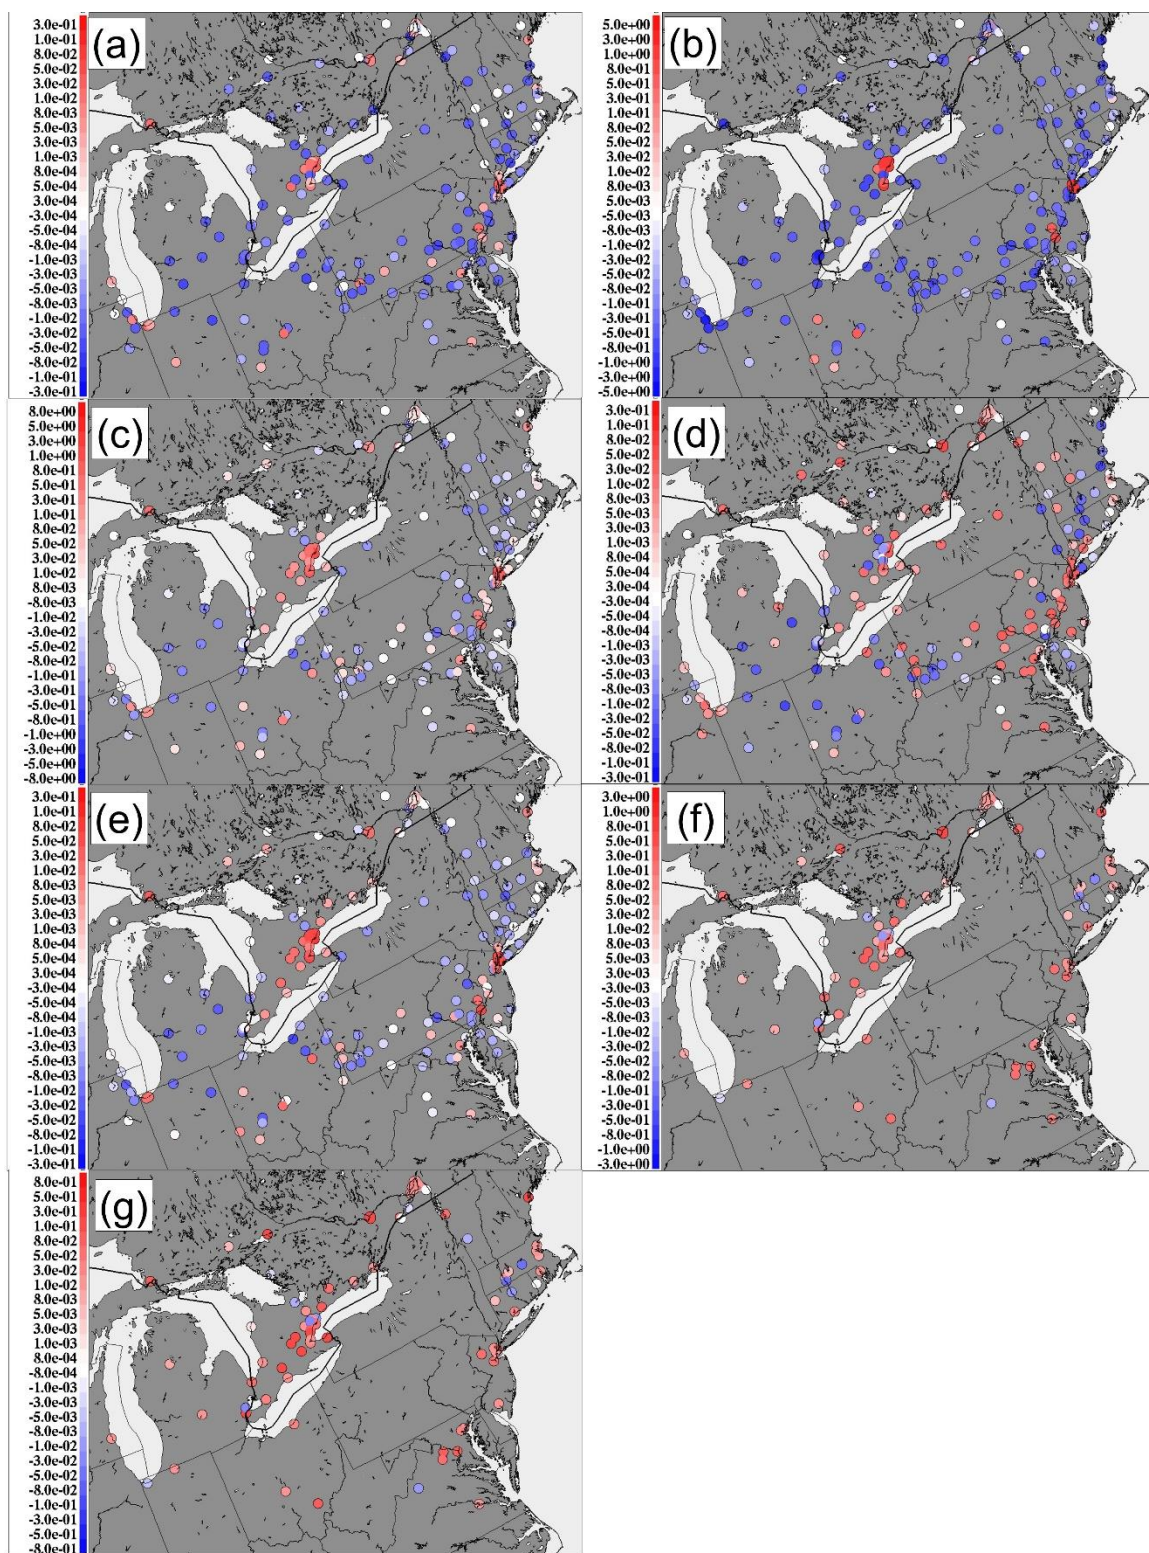

**Fig. S11.** Change in model PM<sub>2.5</sub> performance at 189 surface monitoring sites in the PanAM 2.5km domain, July 2015 (ppbv). Colours and panel labels as in Figure S3.



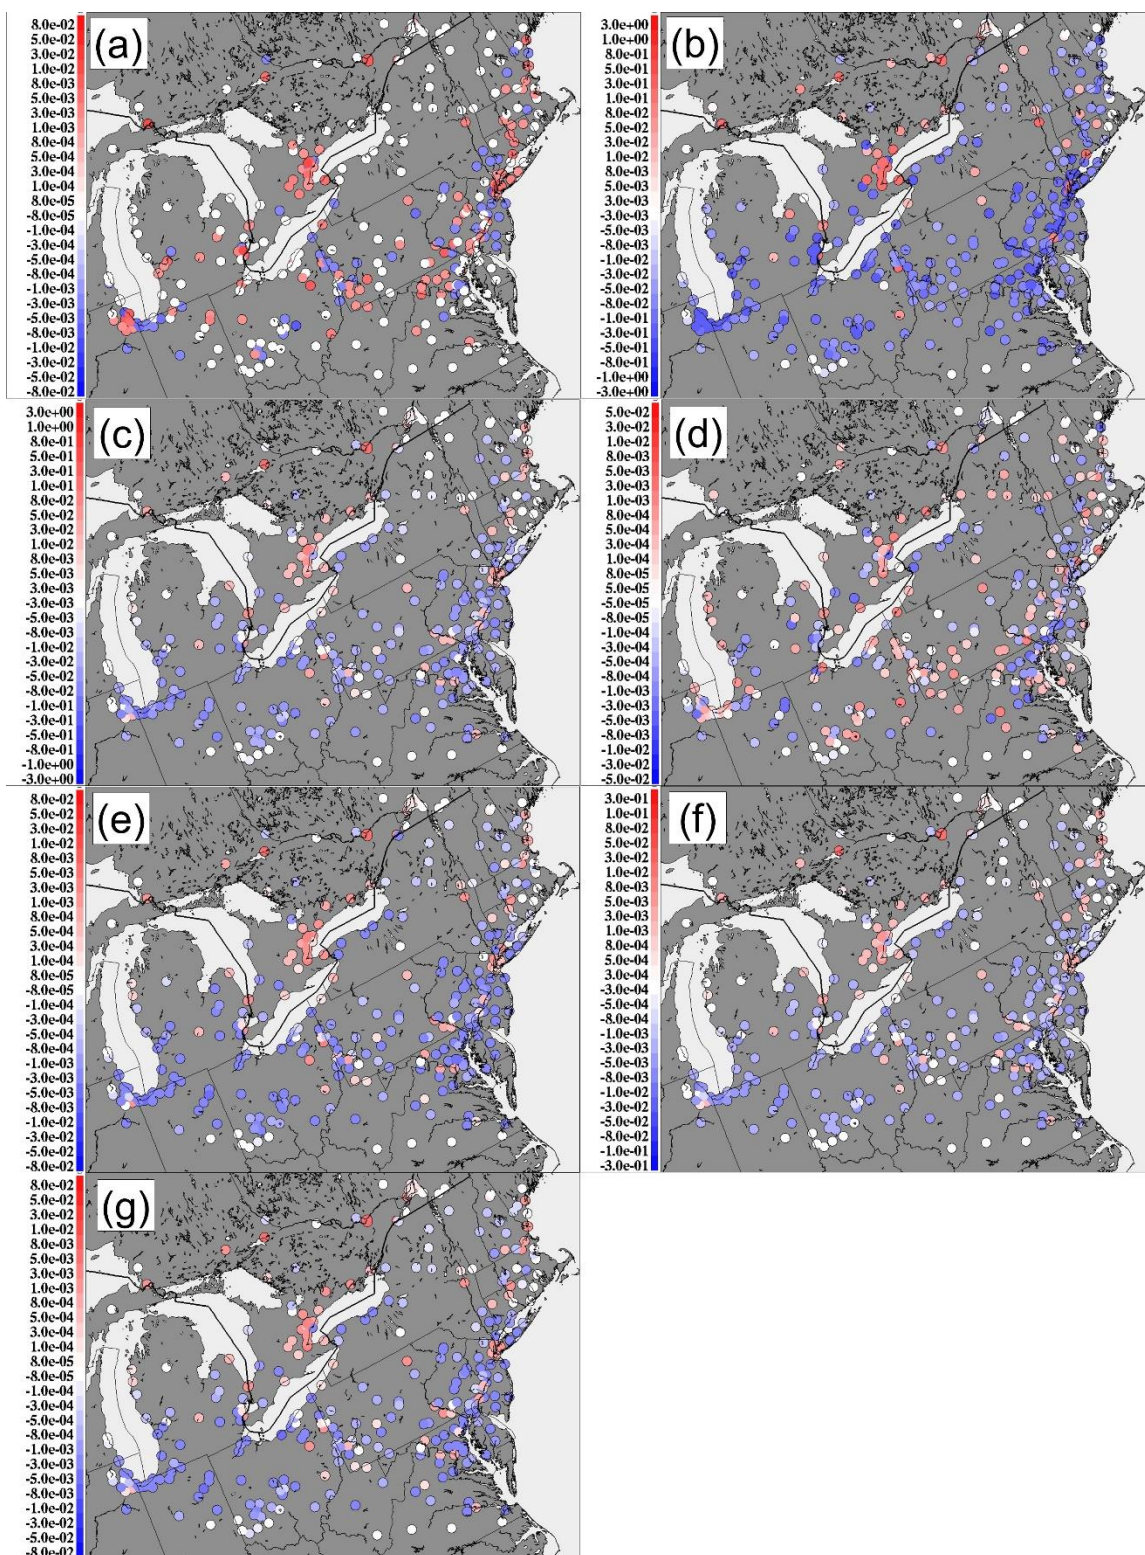

**Fig. S12.** Change in model  $O_3$  performance at 331 surface monitoring sites in the PanAM 2.5km domain, July 2015 (ppbv). Colours and panel labels as in Figure S3.



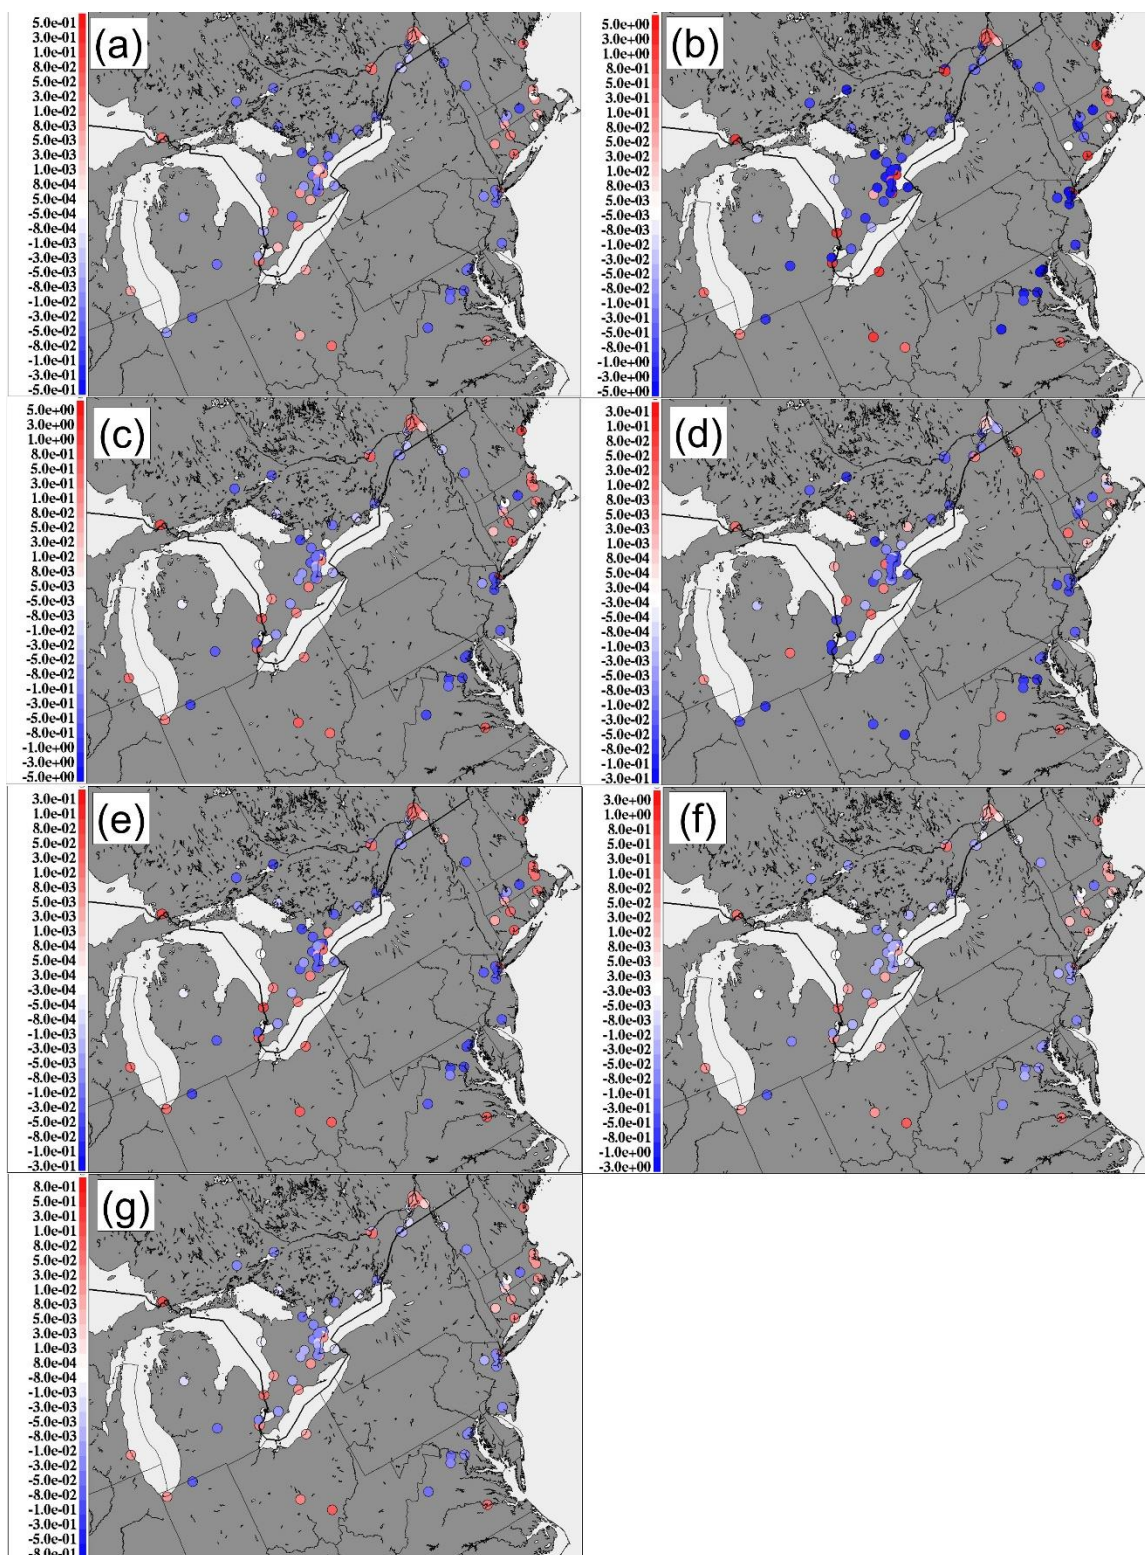

**Fig. S13.** Change in model NO<sub>2</sub> performance at 94 surface monitoring sites in the PanAM 2.5km domain, January 2016 (ppbv). Colours and panel labels as in Figure S3.



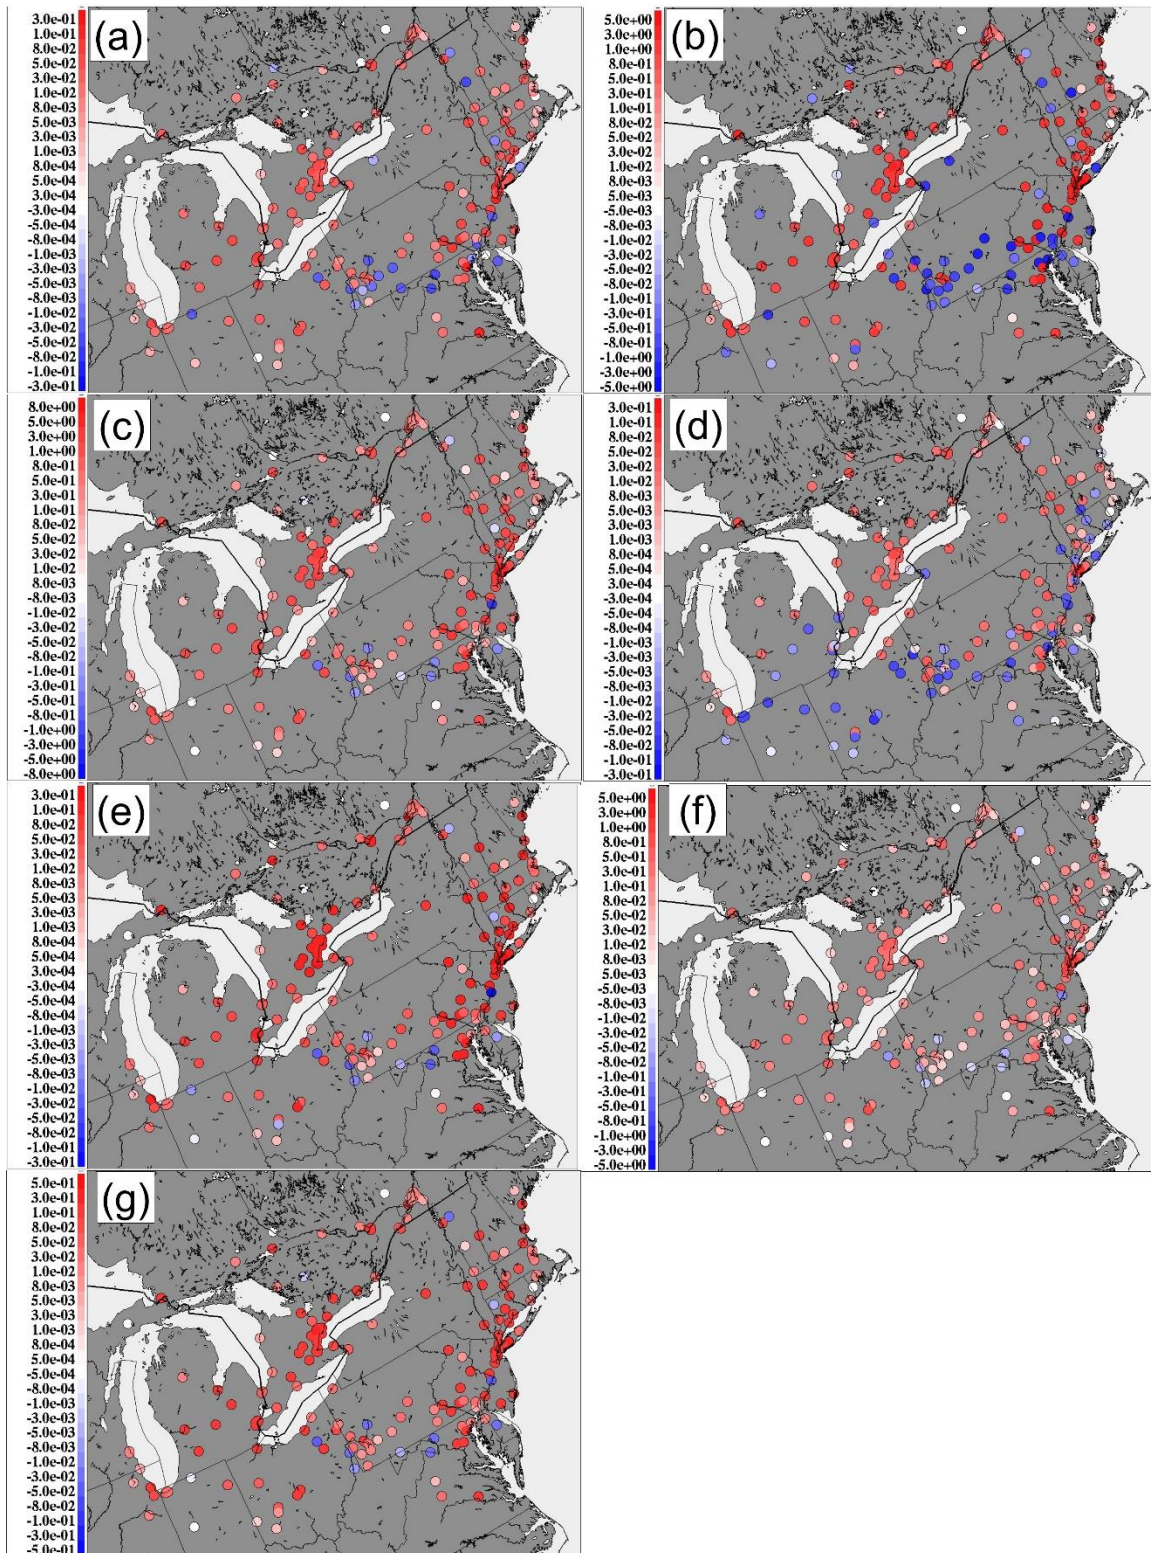

**Fig. S14.** Change in model PM2.5 performance at 192 surface monitoring sites in the PanAM 2.5km domain, January 2016 (ppbv). Colours and panel labels as in Figure S3.



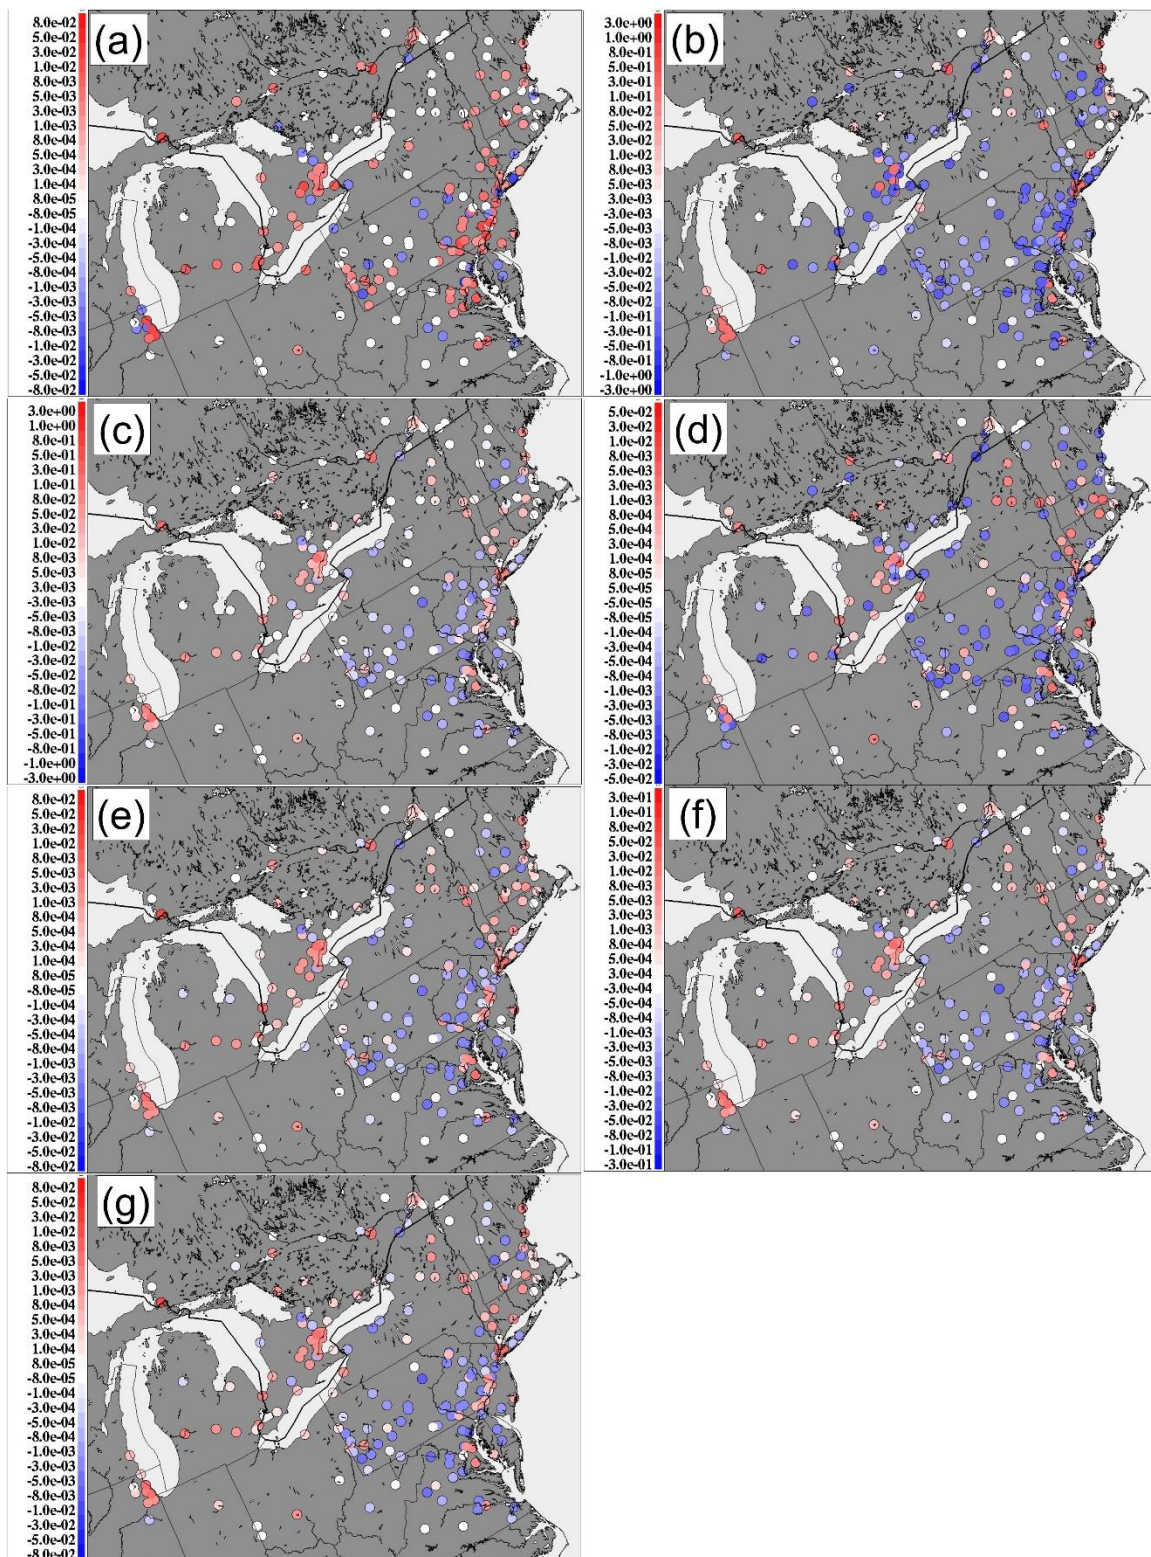

**Fig. S15.** Change in model O<sub>3</sub> performance at 217 surface monitoring sites in the PanAM 2.5km domain, January 2016 (ppbv). Colours and panel labels as in Figure S3.



**Table S1.** Statistical metrics used for model performance evaluation.

| Metric Abbreviation | Formulae (M = model, O = observation)                                                                                          | Meaning                                                                                                                                                           | Perfect Score (Range of Scores) |
|---------------------|--------------------------------------------------------------------------------------------------------------------------------|-------------------------------------------------------------------------------------------------------------------------------------------------------------------|---------------------------------|
| FAC2                | $0.5 \leq \frac{M_i}{O_i} \leq 2.0$                                                                                            | Fraction of model-observation pairs for which the model values fall within a factor of two of the observations.                                                   | 1.0                             |
| MB                  | $MB = \frac{1}{N} \sum_{i=1}^N M_i - O_i$                                                                                      | Mean bias: average of the difference (model – observation) for all data pairs. Negative/positive values indicate model values are lower/higher than observations. | 0.0                             |
| MGE                 | $MGE = \frac{1}{N} \sum_{i=1}^N  M_i - O_i $                                                                                   | Mean Gross Error (aka Mean Absolute Error): average <i>magnitude</i> of the difference between model and observations.                                            | 0.0                             |
| NMGE                | $NMGE = \frac{1}{N} \sum_{i=1}^N \frac{ M_i - O_i }{O_i}$                                                                      | Normalized Mean Gross Error: average magnitude of the relative difference between model and observations                                                          | 0.0                             |
| RMSE                | $RMSE = \sqrt{\left( \frac{\sum_{i=1}^N (M_i - O_i)^2}{N} \right)}$                                                            | Root Mean Square Error: standard deviation of differences between model and observation pairs.                                                                    | 0.0                             |
| r                   | $r = \frac{1}{(N-1)} \sum_{i=1}^N \left( \frac{M_i - \bar{M}}{\sigma_M} \right) \left( \frac{O_i - \bar{O}}{\sigma_O} \right)$ | Pearson correlation coefficient: a measure of the degree of linear dependence                                                                                     | +1.0                            |

|     |                                                                                                                                                                                                                                                                                                                                       |                                                                                                                                                                                                        |     |
|-----|---------------------------------------------------------------------------------------------------------------------------------------------------------------------------------------------------------------------------------------------------------------------------------------------------------------------------------------|--------------------------------------------------------------------------------------------------------------------------------------------------------------------------------------------------------|-----|
|     |                                                                                                                                                                                                                                                                                                                                       | between model and observations.                                                                                                                                                                        |     |
| COE | $COE = 1.0 - \frac{\sum_{i=1}^N  M_i - O_i }{\sum_{i=1}^N  O_i - \bar{O} }$                                                                                                                                                                                                                                                           | Coefficient Of Efficiency: a measure of model accuracy relative to the mean of the observations: a score of zero would indicate that the observed mean is as accurate a predictor as the model values. | 1.0 |
| IOA | $IOA = \begin{cases} 1.0 - \frac{\sum_{i=1}^N  M_i - O_i }{2 \sum_{i=1}^N  O_i - \bar{O} }, \text{ when } \sum_{i=1}^N  M_i - O_i  \leq 2 \sum_{i=1}^N  O_i - \bar{O}  \\ \frac{2 \sum_{i=1}^N  O_i - \bar{O} }{\sum_{i=1}^N  M_i - O_i } - 1.0, \text{ when } \sum_{i=1}^N  M_i - O_i  > 2 \sum_{i=1}^N  O_i - \bar{O}  \end{cases}$ | Index Of Agreement: compares the magnitudes of the model-observation differences to the magnitude of the difference between the observations and their mean.                                           | 1.0 |

**Table S2.** Model performance for NO<sub>2</sub>, PM2.5, and O<sub>3</sub>, 10km grid cell size North American domain, *grid cells containing population density greater than 800 km<sup>-2</sup>*. No VIT refers to simulation without vehicle-induced turbulence, VIT refers to the simulation incorporating vehicle-induced turbulence. **Bold-face** print identifies the better score, *italics* the worse score, and regular font indicates similar performance, between the two simulations, for each metric and chemical species compared.

| Species                        | Evaluation Metric | North America |               | Canada       |               | USA           |               |
|--------------------------------|-------------------|---------------|---------------|--------------|---------------|---------------|---------------|
|                                |                   | No VIT        | VIT           | No VIT       | VIT           | No VIT        | VIT           |
| NO <sub>2</sub><br>(ppbv)      | FAC2              | 0.525         | <b>0.568</b>  | 0.521        | <b>0.573</b>  | 0.528         | <b>0.565</b>  |
|                                | MB                | 2.364         | <b>0.582</b>  | 3.153        | <b>1.651</b>  | 1.786         | <b>-0.201</b> |
|                                | MGE               | 6.028         | <b>4.812</b>  | 5.214        | <b>4.060</b>  | 6.625         | <b>5.364</b>  |
|                                | NMGE              | 0.821         | <b>0.655</b>  | 0.907        | <b>0.706</b>  | 0.779         | <b>0.630</b>  |
|                                | r                 | <b>0.454</b>  | 0.452         | <b>0.483</b> | 0.482         | <b>0.439</b>  | 0.438         |
|                                | RMSE              | 9.214         | <b>7.063</b>  | 7.770        | <b>5.794</b>  | 10.143        | <b>7.865</b>  |
|                                | COE               | -0.238        | <b>0.012</b>  | -0.426       | <b>-0.110</b> | -0.192        | <b>0.035</b>  |
|                                | IOA               | 0.381         | <b>0.506</b>  | 0.287        | <b>0.445</b>  | 0.404         | <b>0.518</b>  |
| PM2.5<br>(µg m <sup>-3</sup> ) | FAC2              | 0.548         | <b>0.567</b>  | 0.511        | <b>0.542</b>  | 0.561         | <b>0.575</b>  |
|                                | MB                | <b>-0.012</b> | -1.065        | 2.990        | <b>1.614</b>  | <b>-0.971</b> | -1.920        |
|                                | MGE               | 5.432         | <b>4.767</b>  | 5.772        | <b>4.611</b>  | 5.310         | <b>4.806</b>  |
|                                | NMGE              | 0.700         | <b>0.615</b>  | 1.008        | <b>0.806</b>  | 0.632         | <b>0.572</b>  |
|                                | r                 | 0.182         | <b>0.216</b>  | 0.200        | <b>0.233</b>  | 0.215         | <b>0.247</b>  |
|                                | RMSE              | 8.630         | <b>7.319</b>  | 9.823        | <b>7.152</b>  | 8.166         | <b>7.326</b>  |
|                                | COE               | -0.273        | <b>-0.117</b> | -0.760       | <b>-0.406</b> | -0.189        | <b>-0.077</b> |
|                                | IOA               | 0.363         | <b>0.441</b>  | 0.120        | <b>0.297</b>  | 0.405         | <b>0.462</b>  |
| O <sub>3</sub><br>(ppbv)       | FAC2              | 0.742         | <b>0.754</b>  | 0.655        | <b>0.672</b>  | 0.765         | <b>0.776</b>  |
|                                | MB                | -2.743        | <b>-2.355</b> | -6.282       | <b>-5.944</b> | -1.905        | <b>-1.503</b> |
|                                | MGE               | 11.079        | <b>10.898</b> | 9.555        | <b>9.322</b>  | 11.448        | <b>11.280</b> |
|                                | NMGE              | 0.351         | <b>0.346</b>  | 0.372        | <b>0.363</b>  | 0.346         | <b>0.341</b>  |
|                                | r                 | 0.743         | <b>0.744</b>  | 0.759        | <b>0.762</b>  | 0.732         | <b>0.733</b>  |
|                                | RMSE              | 14.444        | <b>14.215</b> | 12.022       | <b>11.747</b> | 14.994        | <b>14.772</b> |
|                                | COE               | 0.197         | <b>0.210</b>  | 0.108        | <b>0.130</b>  | 0.198         | <b>0.210</b>  |
|                                | IOA               | 0.598         | <b>0.605</b>  | 0.554        | <b>0.565</b>  | 0.599         | <b>0.605</b>  |
